# Supplementary material for: Identification of New Protein Interactions between Dengue Fever Virus and Its Hosts, Human and Mosquito
Source: PLOS journal article supplement (doi:10.1371/journal.pone.0053535), 2013-01-11

Fig. S2

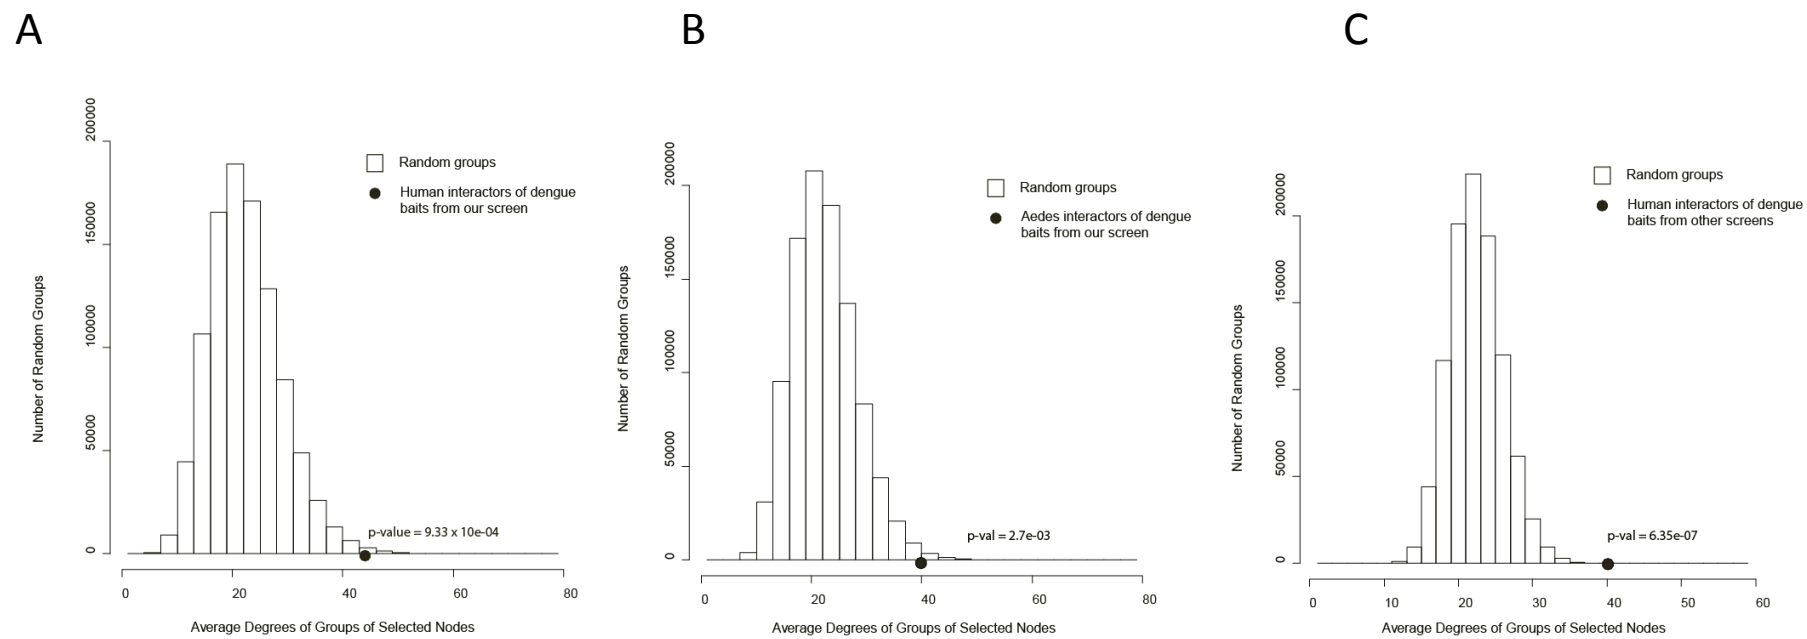

Supplement: S13 (10.1371/journal.pone.0053535.s013) [file journal.pone.0053535.s013]
