# Supplementary material for: Identification of New Protein Interactions between Dengue Fever Virus and Its Hosts, Human and Mosquito
Source: PLoS One. 2013 Jan 11;8(1):e53535. doi: 10.1371/journal.pone.0053535 (PMC3543448; doi:10.1371/journal.pone.0053535)
Supplement: Table S6 — Dengue-human interactions found in this study. (XLSX) [file pone.0053535.s006.xlsx]

## Sheet: TableS6
Table S6. Dengue-human protein interactions. “-” in Expression Result for Co-AP means that the host protein failed to express in the cell lysate, while “+” means that both host and dengue proteins were detected in the cell lysate. “-” in Co-AP Result means that the interaction was not detected by Co-AP, while “+” means that the interaction was detected. “NS” means that a Myc-tagged protein was co…
Human Symbol	Ensembl ID for gene	Name of transcript	baitID	c_LEU	C_LACZ	Reporter Total _C_SUM_	Matrix Detections	Times isolated (ISTs_RFCs)	Reporter Total nonspecific bait 1 (DmCycJ)	Reporter Total nonspecific bait 2 (DmEip63E)	Expression result for Co-AP	Co-AP result	number_serotype	Dengue_1	Dengue_3	Dengue_4	Human ORF tested	Human ORF interaction Y2H c_SUM	Human ORF interaction Co-AP result	Interaction previously reported in publication (PMID)
BIRC2	ENSG00000110330	Homo sapiens baculoviral IAP repeat-containing 2 (BIRC2), mRNA	CA	2	0	2	2	4	0	0	+	+	4	Yes	Yes	Yes	No
BOD1L	ENSG00000038219	Homo sapiens biorientation of chromosomes in cell division 1-like (BOD1L), mRNA	CA	3	1	4	2	7	0	2	+	+	4	Yes	Yes	Yes	No
NAP1L1	ENSG00000187109	Homo sapiens nucleosome assembly protein 1-like 1 (NAP1L1), transcript variant 1, mRNA	CA	1	0	1	2	3	0	3.3	+	+	4	Yes	Yes	Yes	Yes	3	+
AP3B1	ENSG00000132842	Homo sapiens adaptor-related protein complex 3, beta 1 subunit (AP3B1), mRNA	CA	2	2	4	2	1	0	0	+	-	4	Yes	Yes	Yes	No
CD3G	ENSG00000160654	Homo sapiens CD3g molecule, gamma (CD3-TCR complex) (CD3G), mRNA	CA	.5	0	.5	2	6	0	-.3	+	-	4	Yes	Yes	Yes	No
HBB	ENSG00000244734	Homo sapiens hemoglobin, beta (HBB), mRNA	CA	.5	0	.5	2	1	.1	2.1	+	-	1	No	No	No	No
OS9	ENSG00000135506	Homo sapiens osteosarcoma amplified 9, endoplasmic reticulum lectin (OS9), transcript variant 2, mRNA	CA	3	3	6	2	3	0	0	+	-	4	Yes	Yes	Yes	No
S100A9	ENSG00000163220	Homo sapiens S100 calcium binding protein A9 (S100A9), mRNA	CA	3	1	4	2	1	0	0	+	-	4	Yes	Yes	Yes	No
RPS27	ENSG00000177954	Homo sapiens ribosomal protein S27 (RPS27), mRNA	CA	1	0	1	2	2	0	0	-	N/A	4	Yes	Yes	Yes	No
ZNF394	ENSG00000160908	Homo sapiens zinc finger protein 394 (ZNF394), mRNA	CV	2.5	3	5.5	2	1	0	2.5	+	+	3	Yes	No	Yes	No
ANKRD12	ENSG00000101745	Homo sapiens ankyrin repeat domain 12 (ANKRD12), transcript variant 2, mRNA	CV	2.5	3	5.5	2	1	0	0	+	-	4	Yes	Yes	Yes	No
DENND1C	ENSG00000205744	Homo sapiens DENN/MADD domain containing 1C (DENND1C), mRNA	CV	.5	0	.5	2	1	0	0	+	-	4	Yes	Yes	Yes	No
GTPBP4	ENSG00000107937	Homo sapiens GTP binding protein 4 (GTPBP4), mRNA	CV	1.5	2	3.5	2	1	0	0	+	-	3	Yes	No	Yes	No
HBA1	ENSG00000206172	Homo sapiens hemoglobin, alpha 2 (HBA2), mRNA	CV	1.5	0	1.5	2	1	0	0	+	-	4	Yes	Yes	Yes	No
HBB	ENSG00000244734	Homo sapiens hemoglobin, beta (HBB), mRNA	CV	1.5	0	1.5	2	1	.1	2.1	+	-	1	No	No	No	No			21358811
RPL5	ENSG00000122406	Homo sapiens ribosomal protein L5 (RPL5), mRNA	CV	2.5	2	4.5	2	1	0	0	+	-	4	Yes	Yes	Yes	No			21358811
RPS7	ENSG00000171863	Homo sapiens ribosomal protein S7 (RPS7), mRNA	CV	2.5	2	4.5	2	3	0	0	+	-	4	Yes	Yes	Yes	No
RRP12	ENSG00000052749	Homo sapiens ribosomal RNA processing 12 homolog (S. cerevisiae) (RRP12), transcript variant 2, mRNA	CV	2.5	3	5.5	2	2	0	0	+	-	4	Yes	Yes	Yes	No
TMF1	ENSG00000144747	Homo sapiens TATA element modulatory factor 1 (TMF1), mRNA	CV	1.5	3	4.5	2	1	0	0	+	-	4	Yes	Yes	Yes	No
RPL6	ENSG00000089009	Homo sapiens ribosomal protein L6 (RPL6), transcript variant 2, mRNA	CV	2.5	3	5.5	2	1	0	0	-	N/A	4	Yes	Yes	Yes	No
CALCOCO2	ENSG00000136436	Homo sapiens calcium binding and coiled-coil domain 2 (CALCOCO2), mRNA	NS3	.5	4	4.5	2	2	0	7	+	+	4	Yes	Yes	Yes	No
NRBP1	ENSG00000115216	Homo sapiens nuclear receptor binding protein 1 (NRBP1), mRNA	NS3	2.5	3	5.5	2	22	0	.5	+	+	4	Yes	Yes	Yes	Yes	7	+	15084397
RPL24	ENSG00000114391	Homo sapiens ribosomal protein L24 (RPL24), mRNA	NS3	.5	0	.5	2	1	0	0	+	+	1	No	No	No	No
DNTTIP2	ENSG00000067334	Homo sapiens deoxynucleotidyltransferase, terminal, interacting protein 2 (DNTTIP2), mRNA	NS3	.5	4	4.5	2	1	0	8	+	-	4	Yes	Yes	Yes	No
GOLGB1	ENSG00000173230	Homo sapiens golgin B1, golgi integral membrane protein (GOLGB1), mRNA	NS3	.5	1	1.5	2	1	.5	3	+	-	4	Yes	Yes	Yes	No			21911577
HBB	ENSG00000244734	Homo sapiens hemoglobin, beta (HBB), mRNA	NS3	.5	0	.5	2	1	.1	2.1	+	-	2	No	No	Yes	No
ANP32B	ENSG00000136938	Homo sapiens acidic (leucine-rich) nuclear phosphoprotein 32 family, member B (ANP32B), mRNA	NS3	.5	1	1.5	2	1	0	3	+	-	4	Yes	Yes	Yes	No
RILPL2	ENSG00000150977	Homo sapiens Rab interacting lysosomal protein-like 2 (RILPL2), mRNA	NS3	.5	2	2.5	2	2	0	3.3	+	-	3	Yes	No	Yes	Yes	5	+
ZNF410	ENSG00000119725	Homo sapiens zinc finger protein 410 (ZNF410), mRNA	NS3	.5	2	2.5	2	2	0	3.5	+	-	4	Yes	Yes	Yes	Yes	4	-
CORO1A	ENSG00000102879	Homo sapiens coronin, actin binding protein, 1A (CORO1A), mRNA	NS3	.5	1	1.5	2	1	0	0	-	N/A	4	Yes	Yes	Yes	No
LOC100288418		PREDICTED: Homo sapiens similar to OK/SW-CL.16 (LOC100288418), mRNA	NS3	.5	1	1.5	2	1	0	0	-	N/A	4	Yes	Yes	Yes	No
MTF1	ENSG00000188786	Homo sapiens metal-regulatory transcription factor 1 (MTF1), mRNA	NS3	1.5	0	1.5	2	1	.5	0	-	N/A	4	Yes	Yes	Yes	No
OS9	ENSG00000135506	Homo sapiens osteosarcoma amplified 9, endoplasmic reticulum lectin (OS9), transcript variant 4, mRNA	NS3	.5	1	1.5	2	1	0	0	-	N/A	4	Yes	Yes	Yes	No
LRRFIP1	ENSG00000124831	Homo sapiens leucine rich repeat (in FLII) interacting protein 1 (LRRFIP1), transcript variant 5, mRNA	NS3d	.5	0	.5	2	1	1	0	+	NS	2	Yes	No	No	No
NFKBIA	ENSG00000100906	Homo sapiens nuclear factor of kappa light polypeptide gene enhancer in B-cells inhibitor, alpha (NFKBIA), mRNA	NS3d	2.5	2	4.5	2	8	.3	0	+	-	2	Yes	No	No	No			22014111
CYTIP	ENSG00000115165	Homo sapiens cytohesin 1 interacting protein (CYTIP), mRNA	NS5	1.5	2	3.5	2	1	0	2	+	+	4	Yes	Yes	Yes	Yes	4	+
FAM192A	ENSG00000172775	Homo sapiens family with sequence similarity 192, member A (FAM192A), mRNA	NS5	2.5	0	2.5	2	2	.8	0	+	+	4	Yes	Yes	Yes	Yes	7	+
FMR1	ENSG00000102081	Homo sapiens fragile X mental retardation 1 (FMR1), mRNA	NS5	2.5	1	3.5	2	1	0	0	+	+	4	Yes	Yes	Yes	No
DERL2	ENSG00000072849	Homo sapiens Der1-like domain family, member 2 (DERL2), mRNA	NS5	2.5	1	3.5	2	1	0	5	+	-	4	Yes	Yes	Yes	No
HBB	ENSG00000244734	Homo sapiens hemoglobin, beta (HBB), mRNA	NS5	2.5	1	3.5	2	16	.1	2.1	+	-	4	Yes	Yes	Yes	No
IMPDH2	ENSG00000178035	Homo sapiens IMP (inosine monophosphate) dehydrogenase 2 (IMPDH2), mRNA	NS5	2.5	3	5.5	2	1	.5	0	+	-	2	Yes	No	No	No
PSMC1	ENSG00000100764	Homo sapiens proteasome (prosome, macropain) 26S subunit, ATPase, 1 (PSMC1), mRNA	NS5	1.5	1	2.5	2	11	0	3.4	+	-	4	Yes	Yes	Yes	No
RILPL2	ENSG00000150977	Homo sapiens Rab interacting lysosomal protein-like 2 (RILPL2), mRNA	NS5	2.5	2	4.5	2	72	0	3.3	+	-	4	Yes	Yes	Yes	Yes	0	Did not test	21911577
RPL12	ENSG00000197958	Homo sapiens ribosomal protein L12 (RPL12), mRNA	NS5	1.5	1	2.5	2	1	0	2	+	-	4	Yes	Yes	Yes	No
WWP1	ENSG00000123124	Homo sapiens WW domain containing E3 ubiquitin protein ligase 1 (WWP1), mRNA	NS5	2.5	3	5.5	2	1	0	6	+	-	4	Yes	Yes	Yes	Yes	1	Failed to express
HSPA5	ENSG00000044574	Homo sapiens heat shock 70kDa protein 5 (glucose-regulated protein, 78kDa) (HSPA5), mRn/a	NS5	1.5	0	1.5	2	2	.5	0	-	N/A	3	Yes	Yes	No	No
EAF1	ENSG00000144597	Homo sapiens ELL associated factor 1	NS5	N/A	N/A	N/A	1	N/A	0	0	N/A	N/A	N/A	N/A	N/A	N/A	Yes	1	-
EAF2	ENSG00000145088	Homo sapiens ELL associated factor 2	NS5	N/A	N/A	N/A	1	N/A	0	0	N/A	N/A	N/A	N/A	N/A	N/A	Yes	1	Failed to express
EEF1B2	ENSG00000114942	Homo sapiens eukaryotic translation elongation factor 1 beta 2	NS5	N/A	N/A	N/A	1	N/A	0	0	N/A	N/A	N/A	N/A	N/A	N/A	Yes	2	-
TRIM2	ENSG00000109654	Homo sapiens tripartite motif containing 2	NS5	N/A	N/A	N/A	1	N/A	0	0	N/A	N/A	N/A	N/A	N/A	N/A	Yes	1	Failed to express
XPA	ENSG00000136936	Homo sapiens xeroderma pigmentosum, complementation group A	NS5	N/A	N/A	N/A	1	N/A	0	0	N/A	N/A	N/A	N/A	N/A	N/A	Yes	1	-
HSP90AB1	ENSG00000096384	Homo sapiens heat shock protein 90kDa alpha (cytosolic), class B member 1	NS3	N/A	N/A	N/A	1	N/A	0	0	N/A	N/A	N/A	N/A	N/A	N/A	Yes	1	+
