# Supplementary material for: Identification of New Protein Interactions between Dengue Fever Virus and Its Hosts, Human and Mosquito
Source: PLoS One. 2013 Jan 11;8(1):e53535. doi: 10.1371/journal.pone.0053535 (PMC3543448; doi:10.1371/journal.pone.0053535)
Supplement: Table S11 — Yeast two-hybrid screen details. (XLSX) [file pone.0053535.s011.xlsx]

## Sheet: TableS11
Table S11. Yeast two-hybrid screening results
screenID	baitID	preyID	Total diploid (DFU)	Background/DFU	Positive Diploid	=+ve/DFU	colonies_picked	G_D_colonies	Pass_repro_n_spec	AluI_unique	sequenced_unique
1	D2CA	Ae	118200000	7.49e-07	100	0.000846024	96	47	39	21	3
2	D2CV	Ae	56300000	5.32e-05	560	9.94671e-06	192	85	53	27	14
3	D2PrM	Ae	49200000	2e-06	120	0.00243902	96	6	3	3	2
4	D2M	Ae	153000000	3.73e-07	10	6.53595e-08	96	0	0	0	0
5	D2E	Ae	58100000	1.09e-06	150	0.00258176	96	0	0	0	0
6	D2E3	Ae	75000000	8.75e-06	400	5.33333e-06	96	0	0	0	0
7	D2NS1	Ae	187000000	1.33e-06	100	5.34759e-07	96	0	0	0	0
8	D2NS2A	Ae	57900000	4.6e-07	20	0.000345423	96	4	0	0	0
9	D2NS2B	Ae	65000000	7e-07	20	3.07692e-07	96	3	0	0	0
10	D2NS3	Ae	63000000	2.3e-05	2340	3.71429e-05	384	269	105	84	33
11	D2NS3d	Ae	41000000	1.1e-05	3000	7.31707e-05	288	11	6	5	4
12	D2NS4A	Ae	65200000	4.6e-07	80	0.00122699	96	3	2	1	1
13	D2NS4B	Ae	51200000	1e-06	70	0.00136719	96	5	3	1	1
14	D2NS5	Ae	196000000	1e-05	24000	0.00122449	1248	611	480	436	50 (out of 129 sequenced)
15	D2CA	PBL	119800000	7.49e-07	350	0.00292154	96	38	27	18	11
16	D2CV	PBL	230000000	5.32e-05	800	3.47826e-06	192	46	19	18	12
17	D2PrM	PBL	31400000	2e-06	350	0.0111465	96	0	0	0	0
18	D2M	PBL	99500000	3.73e-07	70	7.03518e-07	96	0	0	0	0
19	D2E	PBL	63500000	1.09e-06	40	0.000629921	96	0	0	0	0
20	D2E3	PBL	101000000	8.75e-06	500	4.9505e-06	96	0	0	0	0
21	D2NS1	PBL	78000000	1.33e-06	0	0	0	0	0	0	0
22	D2NS2A	PBL	79100000	4.6e-07	60	0.000758534	96	0	0	0	0
23	D2NS2B	PBL	49000000	7e-07	20	4.08163e-07	96	1	0	0	0
24	D2NS3	PBL	179000000	2.3e-05	1700	9.49721e-06	288	85	53	43	13
25	D2NS3d	PBL	56000000	1.1e-05	7700	0.0001375	480	35	11	6	2
26	D2NS4A	PBL	36800000	4.6e-07	170	0.00461956	96	2	0	0	0
27	D2NS4B	PBL	34700000	1e-06	90	0.00259366	96	0	0	0	0
28	D2NS5	PBL	190000000	1e-05	7500	3.94737e-05	480	243	146	112	11(out of 81 sequenced)
